# Supplementary material for: Combining the Emission Preprocessor HERMES with the Chemical Transport Model TM5-MP
Source: MDPI journal article supplement (doi:10.3390/atmos15040469), 2024-04-10
Supplement: s1 [file s1]

# Supplementary Materials: Combining The Emission Preprocessor HERMES With The Chemical Transport Model TM5-MP

Sarah-Lena Seemann <sup>1</sup>, Nikos Daskalakis <sup>1</sup>, Kun Qu <sup>1</sup> and Mihalis Vrekoussis <sup>1,2,3</sup>

## 1. Flowcharts

1

## TM5-MP without HERMES

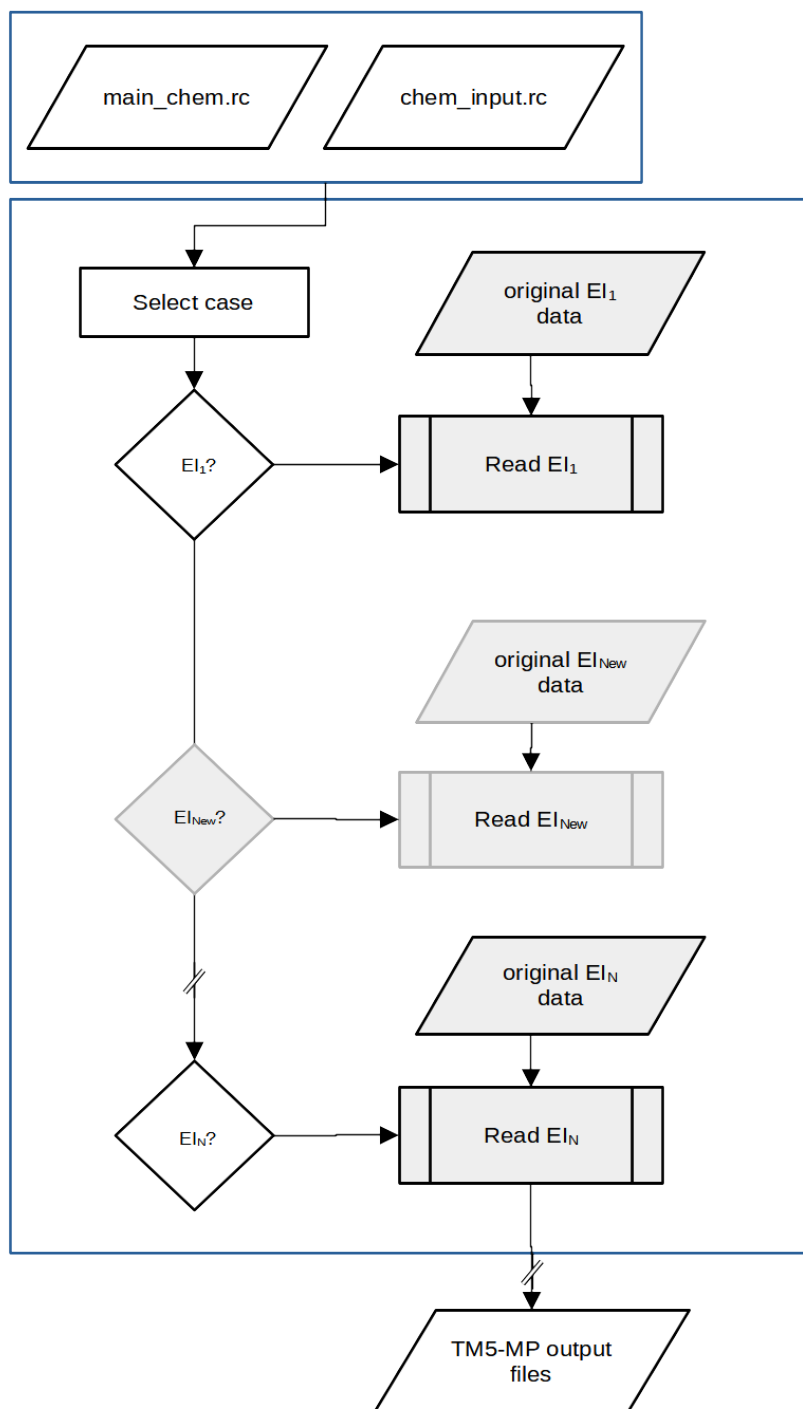**Figure S1.** Flowchart for TM5-MP.

## HERMES

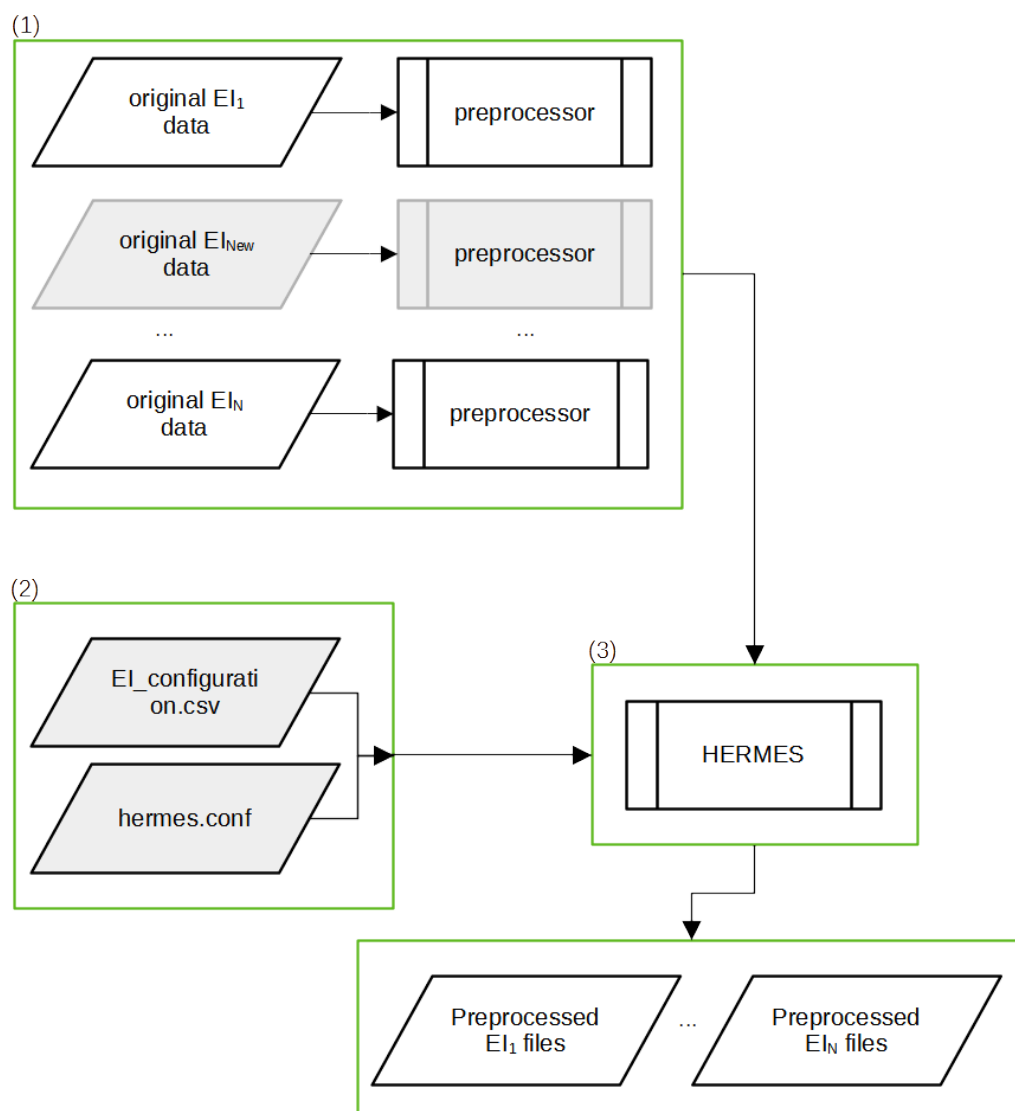

**Figure S2.** Flowchart for HERMES.

## TM5-MP for use with HERMES

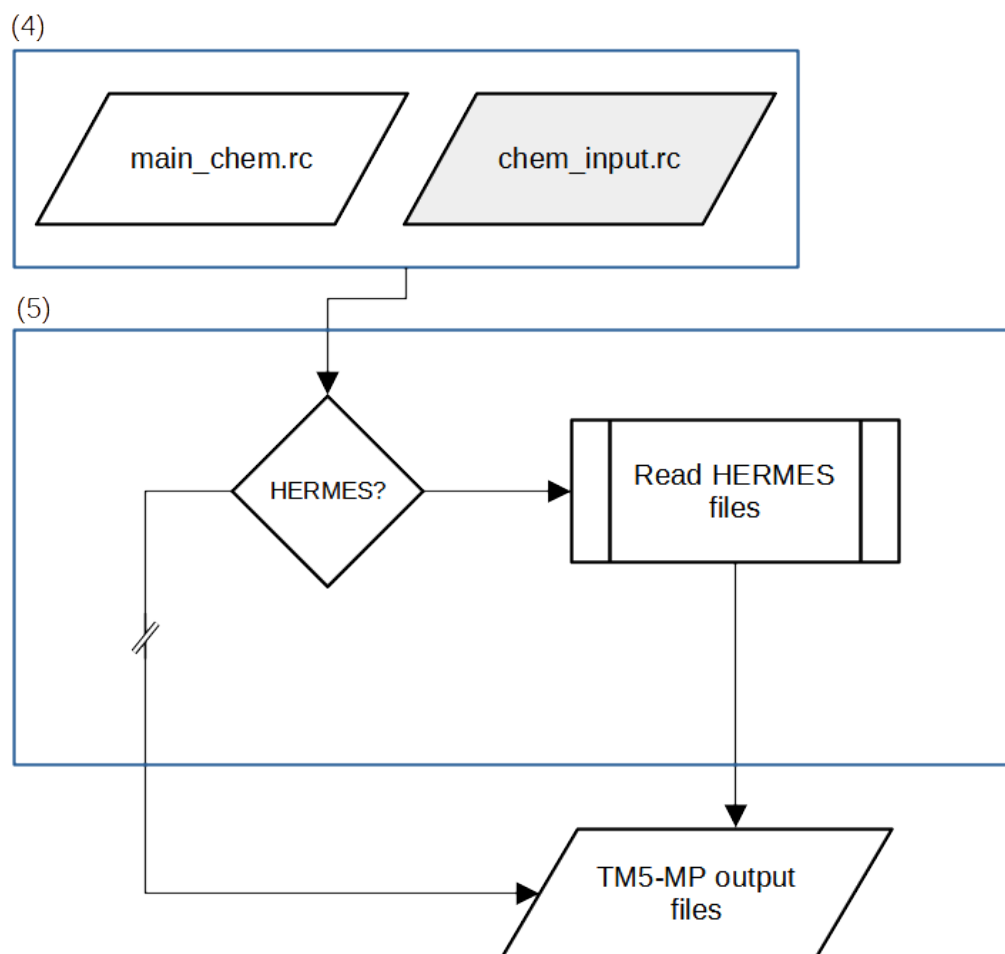

**Figure S3.** Flowchart for TM5-MP [with new workflow](#).

### 2. Used Cluster

The model runs were performed on the HPC cluster Aether at the University of Bremen, financed by DFG within the scope of the Excellence Initiative. With 56 compute nodes: 2x Intel Xeon E5-2690v4 CPUs (2.6 GHz, 14 cores each, 16x 256 GB RAM, 40x 128 GB RAM)

2  
3  
4  
5  
6

### 3. Comparison of the old and new workflow

7

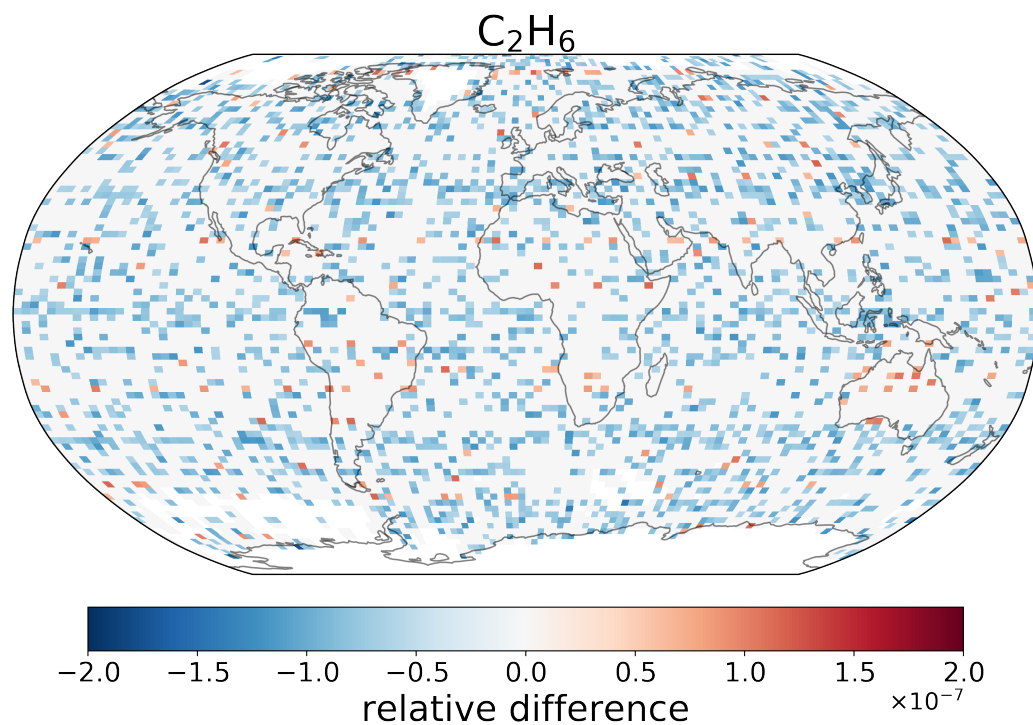

**Figure S4.** Differences between the resulting  $C_2H_6$  budgets using the 'original' workflow (without the use of HERMES) and 'HERMES' workflow (with emission prepared through HERMES) relative to the results of the 'original' workflow.

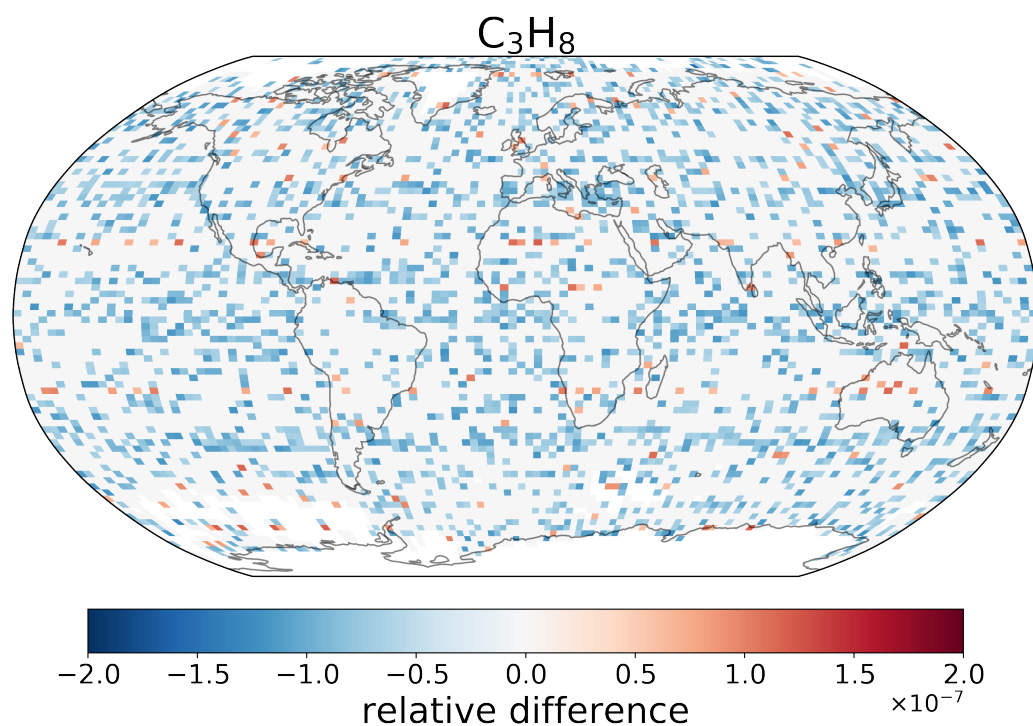

**Figure S5.** Differences between the resulting  $C_3H_8$  budgets using the 'original' workflow (without the use of HERMES) and 'HERMES' workflow (with emission prepared through HERMES) relative to the results of the 'original' workflow.

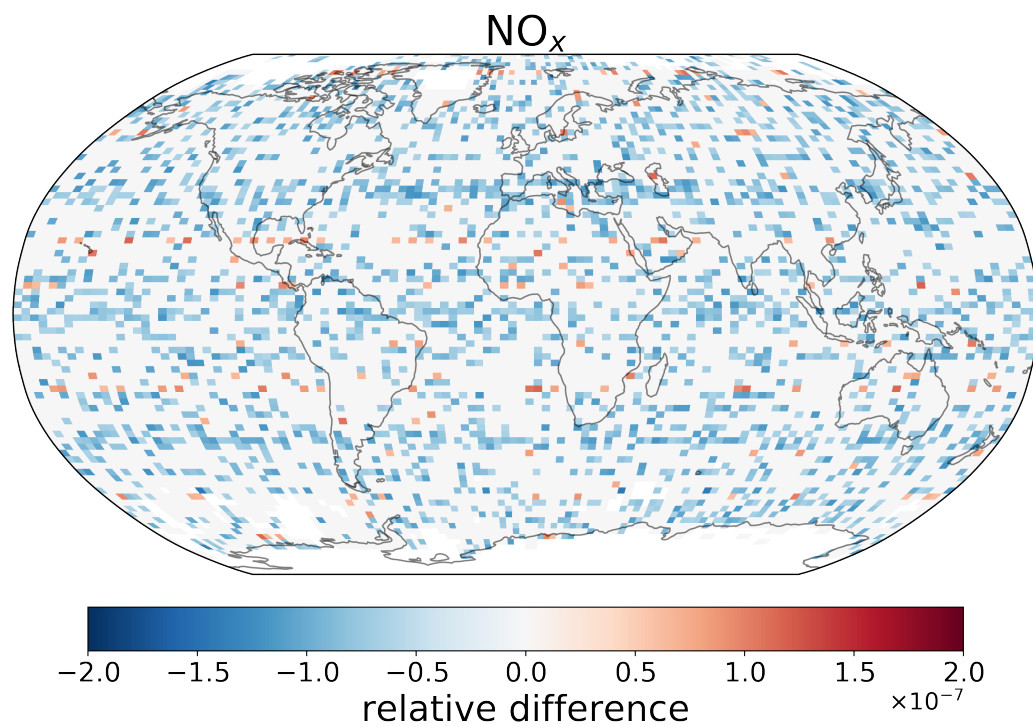

**Figure S6.** Differences between the resulting  $\text{NO}_x$  budgets using the 'original' workflow (without the use of HERMES) and 'HERMES' workflow (with emission prepared through HERMES) relative to the results of the 'original' workflow.

## 4. Measurements

### 4.1. Source of measurement data

**Table S1.** Sources of measurements used

| Data source                                                                                                  | Country / Region                                                                         | Download Links                                                                                                                                                                                                                                                                                                                                                                                                                                                                                                                                                                                                                                                                                                                                    | Last accessed                          |
|--------------------------------------------------------------------------------------------------------------|------------------------------------------------------------------------------------------|---------------------------------------------------------------------------------------------------------------------------------------------------------------------------------------------------------------------------------------------------------------------------------------------------------------------------------------------------------------------------------------------------------------------------------------------------------------------------------------------------------------------------------------------------------------------------------------------------------------------------------------------------------------------------------------------------------------------------------------------------|----------------------------------------|
| CNEMC (China National Environmental Monitoring Centre)                                                       | Mainland China                                                                           | <a href="https://quotsoft.net/air/">https://quotsoft.net/air/</a>                                                                                                                                                                                                                                                                                                                                                                                                                                                                                                                                                                                                                                                                                 | 15.05.2023                             |
| EPD (Environmental Protection Department), Hong Kong                                                         | Hong Kong                                                                                | <a href="https://cd.epic.epd.gov.hk/EPICDI/air/station/?lang=en">https://cd.epic.epd.gov.hk/EPICDI/air/station/?lang=en</a>                                                                                                                                                                                                                                                                                                                                                                                                                                                                                                                                                                                                                       | 27.04.2023                             |
| Ministry of Environment, Taiwan                                                                              | Taiwan                                                                                   | <a href="https://data.moenv.gov.tw/dataset/detail/AQX_P_15">https://data.moenv.gov.tw/dataset/detail/AQX_P_15</a>                                                                                                                                                                                                                                                                                                                                                                                                                                                                                                                                                                                                                                 | 29.04.2023                             |
| National Institute of Environmental Sciences (NIES), Korea                                                   | Korea                                                                                    | <a href="https://www.airkorea.or.kr/web/last_amb_hour_data?pMENU_NO=123">https://www.airkorea.or.kr/web/last_amb_hour_data?pMENU_NO=123</a>                                                                                                                                                                                                                                                                                                                                                                                                                                                                                                                                                                                                       | 24.04.2023                             |
| AAQMS (Ambient Air Quality Monitoring Stations) and RsAQMS (Roadside Air Quality Monitoring Stations), Japan | Japan                                                                                    | <a href="https://tenbou.nies.go.jp/download">https://tenbou.nies.go.jp/download</a>                                                                                                                                                                                                                                                                                                                                                                                                                                                                                                                                                                                                                                                               | 08.05.2023                             |
| Nation Ambient Air Quality Monitoring Program (NAMP), Central Pollution Control Board (CPCB), India          | India                                                                                    | <a href="https://app.cpcbcr.com/ccr/#/caaqm-dashboard-all/caaqm-landing">https://app.cpcbcr.com/ccr/#/caaqm-dashboard-all/caaqm-landing</a>                                                                                                                                                                                                                                                                                                                                                                                                                                                                                                                                                                                                       | 07.08.2023                             |
| AURN (Automatic Urban and Rural Network)                                                                     | U.K.                                                                                     | directly downloaded by using the importAURN function in the openair R package                                                                                                                                                                                                                                                                                                                                                                                                                                                                                                                                                                                                                                                                     | 04.07.2023                             |
| AQS (Air Quality System), U.S.                                                                               | U.S.                                                                                     | <a href="https://aqs.epa.gov/aqswweb/airdata/download_files.html">https://aqs.epa.gov/aqswweb/airdata/download_files.html</a>                                                                                                                                                                                                                                                                                                                                                                                                                                                                                                                                                                                                                     | 07.05.2023                             |
| National Air Pollution Surveillance (NAPS) program, Environment and Climate Change Canada                    | Canada                                                                                   | <a href="https://donnees-data.ec.gc.ca/data/air/monitor/national-air-pollution-surveillance-naps-program">https://donnees-data.ec.gc.ca/data/air/monitor/national-air-pollution-surveillance-naps-program</a>                                                                                                                                                                                                                                                                                                                                                                                                                                                                                                                                     | 22.06.2023                             |
| SINCA (Sistema de Información Nacional de Calidad del Aire), Chile                                           | Chile                                                                                    | <a href="https://sinca.mma.gob.cl/index.php">https://sinca.mma.gob.cl/index.php</a>                                                                                                                                                                                                                                                                                                                                                                                                                                                                                                                                                                                                                                                               | 27.09.2023                             |
| City of Cape Town, South Africa                                                                              | Cape Town, South Africa                                                                  | <a href="https://odp-cctegis.opendata.arcgis.com/documents/cctegis:air-quality/about">https://odp-cctegis.opendata.arcgis.com/documents/cctegis:air-quality/about</a>                                                                                                                                                                                                                                                                                                                                                                                                                                                                                                                                                                             | 01.06.2023                             |
| Australian Capital Territory Government                                                                      | Australian Capital Territory, Australia                                                  | <a href="https://www.data.act.gov.au/Environment/Air-Quality-Monitoring-Data/94a5-zqnn">https://www.data.act.gov.au/Environment/Air-Quality-Monitoring-Data/94a5-zqnn</a>                                                                                                                                                                                                                                                                                                                                                                                                                                                                                                                                                                         | 06.06.2023                             |
| New South Wales Air Quality Monitoring Network                                                               | New South Wales, Australia                                                               | <a href="https://www.dpie.nsw.gov.au/air-quality/air-quality-data-services/data-download-facility">https://www.dpie.nsw.gov.au/air-quality/air-quality-data-services/data-download-facility</a>                                                                                                                                                                                                                                                                                                                                                                                                                                                                                                                                                   | 06.06.2023                             |
| Northern Territory Environment Protection Authority                                                          | Northern Territory, Australia                                                            | <a href="http://ntepa.webhop.net/NTEPA/Default.ltr.aspx">http://ntepa.webhop.net/NTEPA/Default.ltr.aspx</a>                                                                                                                                                                                                                                                                                                                                                                                                                                                                                                                                                                                                                                       | 01.06.2023                             |
| Queensland Government                                                                                        | Queensland, Australia                                                                    | <a href="https://www.data.qld.gov.au/dataset/air-quality-monitoring-2013">https://www.data.qld.gov.au/dataset/air-quality-monitoring-2013</a><br><a href="https://www.data.qld.gov.au/dataset/air-quality-monitoring-2014">https://www.data.qld.gov.au/dataset/air-quality-monitoring-2014</a><br><a href="https://www.data.qld.gov.au/dataset/air-quality-monitoring-2015">https://www.data.qld.gov.au/dataset/air-quality-monitoring-2015</a><br><a href="https://www.data.qld.gov.au/dataset/air-quality-monitoring-2016">https://www.data.qld.gov.au/dataset/air-quality-monitoring-2016</a><br><a href="https://www.data.qld.gov.au/dataset/air-quality-monitoring-2017">https://www.data.qld.gov.au/dataset/air-quality-monitoring-2017</a> | 02.06.2023                             |
| South Australian Environment Protection Authority                                                            | South Australia, Australia                                                               | <a href="https://data.sa.gov.au/data/dataset/?tags=air+pollution">https://data.sa.gov.au/data/dataset/?tags=air+pollution</a>                                                                                                                                                                                                                                                                                                                                                                                                                                                                                                                                                                                                                     | 08.06.2023                             |
| Environment Protection Authority Victoria                                                                    | Victoria, Australia                                                                      | <a href="https://discover.data.vic.gov.au/dataset/epa-air-watch-all-sites-air-quality-hourly-averages-yearly/historical">https://discover.data.vic.gov.au/dataset/epa-air-watch-all-sites-air-quality-hourly-averages-yearly/historical</a>                                                                                                                                                                                                                                                                                                                                                                                                                                                                                                       | 11.06.2023                             |
| EANET (Acid Deposition Monitoring Network in East Asia)                                                      | East Asia (Mongolia), Southeast Asia (Indonesia, Thailand, Philippines)                  | <a href="https://monitoring.eanet.asia/document/public/index">https://monitoring.eanet.asia/document/public/index</a>                                                                                                                                                                                                                                                                                                                                                                                                                                                                                                                                                                                                                             | 15.03.2023                             |
| TOAR (Tropospheric Ozone Assessment Report) *                                                                | West Asia (Turkey), Europe (U.K. not included), Latin America (Mexico, Brazil, Colombia) | <a href="https://toar-data.org/surface-data">https://toar-data.org/surface-data</a>                                                                                                                                                                                                                                                                                                                                                                                                                                                                                                                                                                                                                                                               | 26.04.2023                             |
| National Oceanic and Atmospheric Administration (NOAA)                                                       | Global                                                                                   | <a href="https://gml.noaa.gov/aftp/data/trace_gases/co/flask/">https://gml.noaa.gov/aftp/data/trace_gases/co/flask/</a><br><a href="https://gml.noaa.gov/aftp/data/trace_gases/voc/c2h6/flask/">https://gml.noaa.gov/aftp/data/trace_gases/voc/c2h6/flask/</a><br><a href="https://gml.noaa.gov/aftp/data/trace_gases/voc/c3h8/flask/">https://gml.noaa.gov/aftp/data/trace_gases/voc/c3h8/flask/</a>                                                                                                                                                                                                                                                                                                                                             | 24.07.2023<br>01.08.2023<br>01.08.2023 |

\* Original sources of TOAR data in Europe include: (1) European Environment Agency (EEA)'s Airbase; (2) European Monitoring and Evaluation Programme (EMEP); (3) German Environment Agency's Air Data (UBA); (4) Institute of Geosciences, Dept. Meteorology, University of Bonn, Germany (MIUB). This information is found in: [https://toar-data.fz-juelich.de/sphinx/TOAR\\_TG\\_Vol02\\_Data\\_Processing/build/html/data-sources.html](https://toar-data.fz-juelich.de/sphinx/TOAR_TG_Vol02_Data_Processing/build/html/data-sources.html)

#### 4.2. Location of measurement stations

For this study a large number of measurements were used to compare to the modelled mixing ratios. The location of these stations, as well as the providers are listed below, depending on their species.

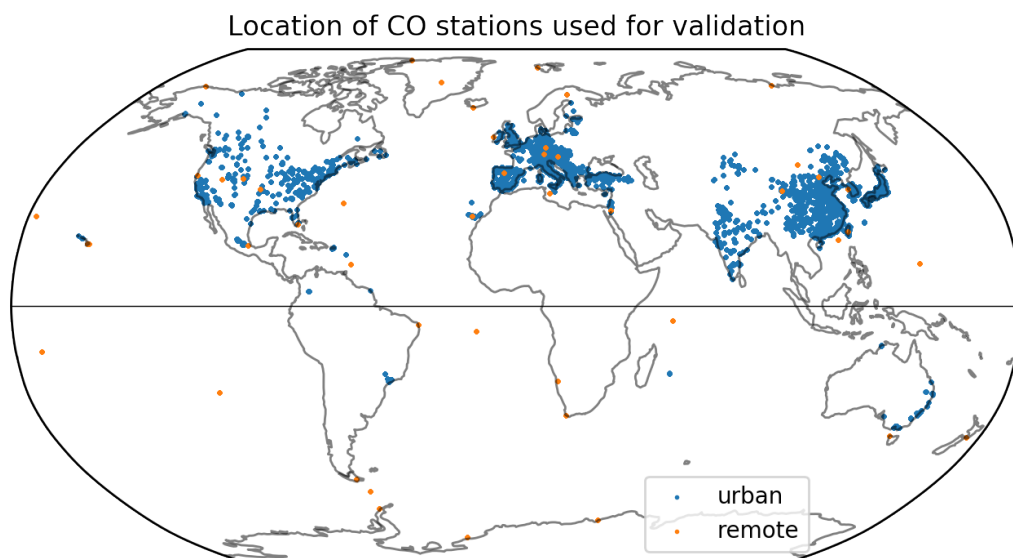

**Figure S7.** Location of CO measurement stations used for validation. Orange dots are representing NOAA stations ('remote'), while blue dots are showing stations closer to polluted regions.

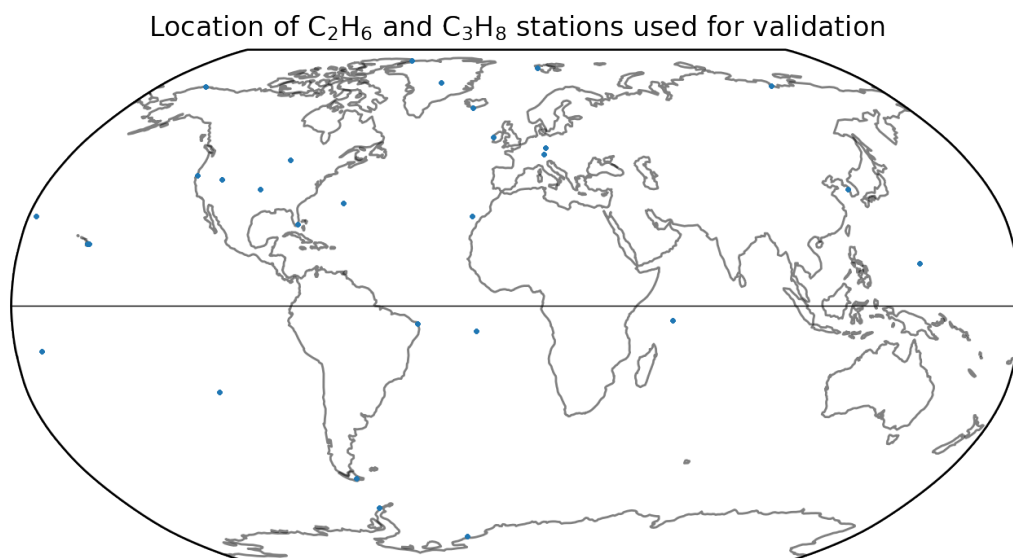

**Figure S8.** Location of  $C_2H_6$  and  $C_3H_8$  NOAA measurement stations used for validation.



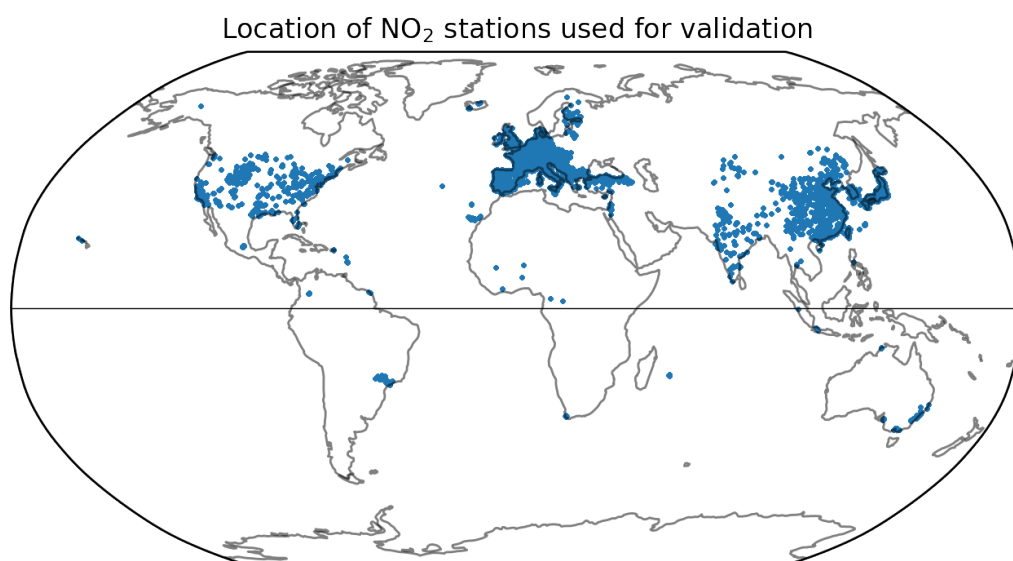

**Figure S9.** Location of stations used for validation with NO<sub>2</sub> measurement data.

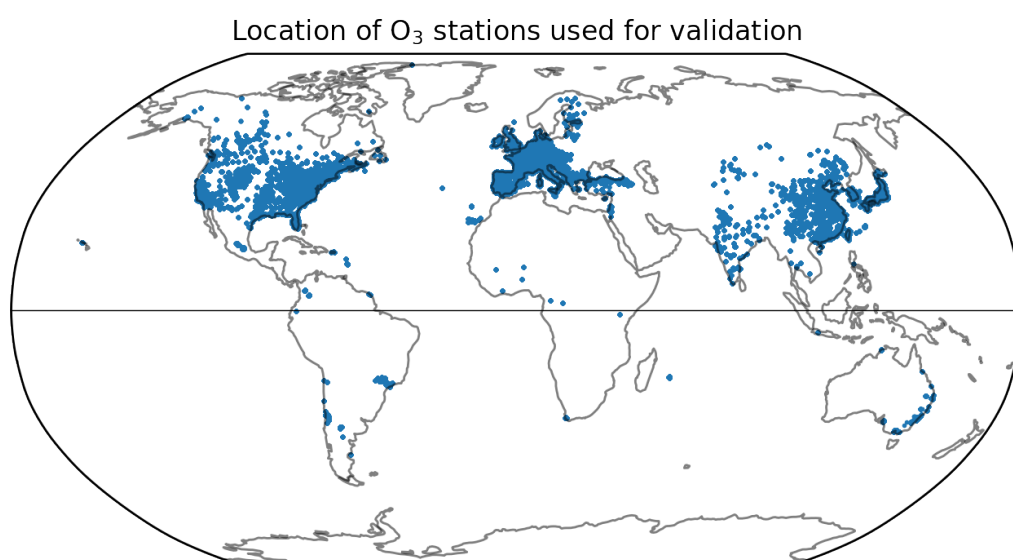

**Figure S10.** Location of stations used for validation with O<sub>3</sub> measurements.

## 5. Averaged difference between CEDS and REAS

14

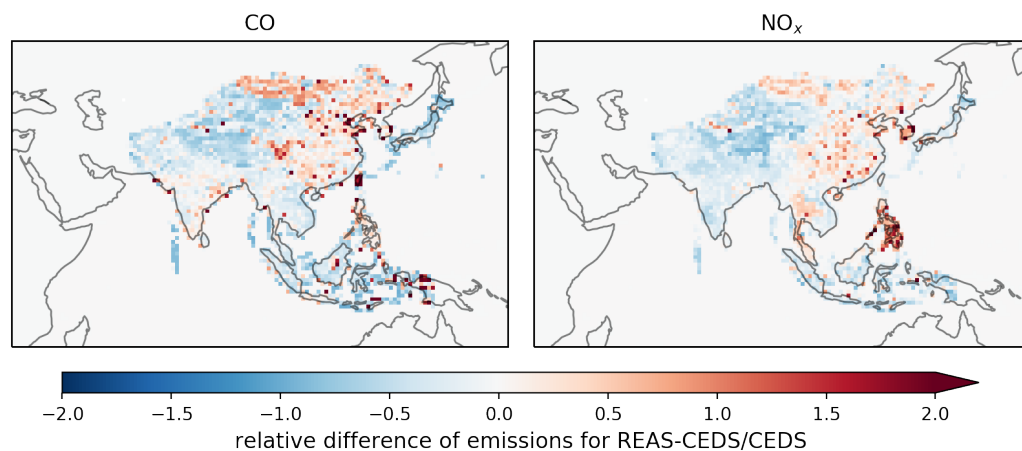

**Figure S11.** Relative difference between REAS and CEDS for CO and NO<sub>2</sub>, averaged over the year 2012 – 2014.

Figure S11 shows the relative difference between REAS and CEDS for CO and NO<sub>2</sub>. It can be seen, that for CO there are many regions having higher emissions in REAS seen as light red regions. This fits to the results seen from the validation, where an introduction of REAS data into the model is increasing the modeled mixing ratios. For NO<sub>2</sub>, on the other hand, most of the region is displayed in blue, depicting smaller emissions in REAS. This also is inline with the results from the model validation, where the introduction of REAS leads to a reduction of NO<sub>2</sub> mixing ratios. One exception are the Philippines. However, no measurement data was available for this study, so the expected increase was not observed here.

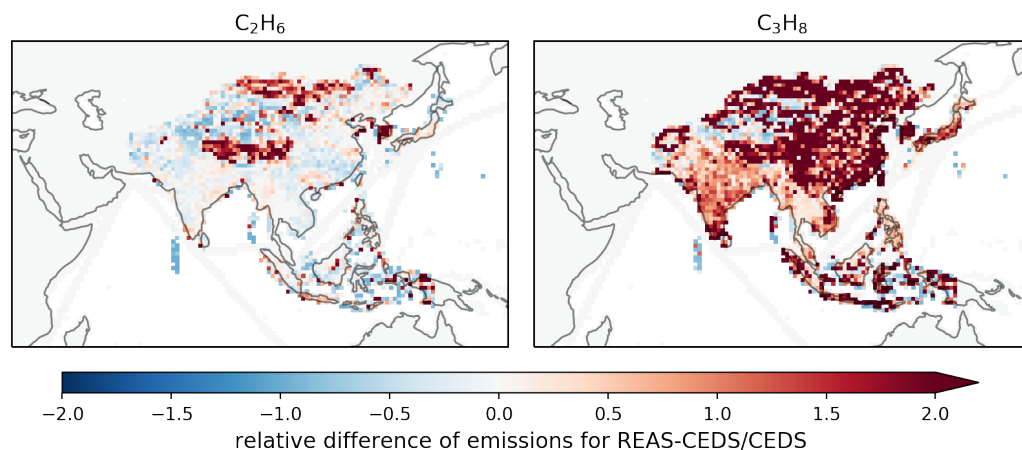

**Figure S12.** Relative difference between REAS and CEDS for C<sub>2</sub>H<sub>6</sub> and C<sub>3</sub>H<sub>8</sub>, averaged over the year 2012 – 2014.

## 6. Results

### 6.1. Used metrics

To evaluate the differences between modeled results and measurements four different metrics were used. The bias and normalized mean bias were calculated based on the equations given below. The error where derived from the standard deviation of the differences between model and measurements, in case of the NMB additionally normalized to the measurements. The slope was derived from a fitted linear function. Furthermore, the Pearson correlation was calculated from the linear fit.

$$MB = \frac{1}{N} \sum_{i=1}^N (M_i - O_i). \quad (1)$$

$$NMB = \frac{1}{N} \frac{\sum_{i=1}^N (M_i - O_i)}{\sum_{i=1}^N O_i}. \quad (2)$$

## 6.2. Scatter plots

32

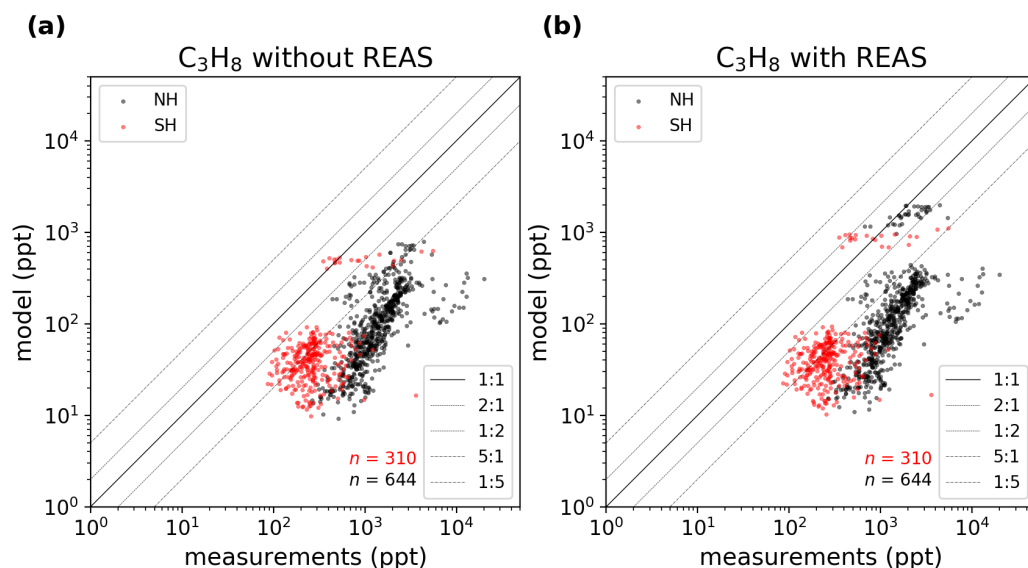

**Figure S13.** Comparison between the measured and modeled monthly-mean near-surface concentrations of ethane ( $C_3H_8$ ). The results were split in stations in the Northern Hemisphere (NH, in black), and the Southern Hemisphere (SH, in red). The results in the simulation without and with REAS are shown in the panel a and b, respectively. The solid black line is the 1:1 line, while the dashed lines are the 1:5, 1:2, 2:1 and 5:1 lines.

Figure S13 shows the comparison of modeled and measured results of propane at several NOAA stations. The model results were analyzed for the model runs with and without REAS data included. The results for the Northern Hemisphere look similar to those for ethane shown in the main part of the manuscript. For the Southern Hemisphere (SH) one station shows a significant larger modeled propane than the rest of the stations. These values belong to a measurements station in Bukit Kototabang in Indonesia. The good agreement of modeled and measured propane at that station, which even increases with the use of REAS, results in a significant improvement of the averaged bias from all stations in the SH. However, this improvement is not as significant at the other stations, if existing at all.

## 6.3. Statistics

The statistics resulting from the comparison of modeled and measured mixing ratios for  $C_3H_8$ ,  $NO_2$  as well as  $O_3$  are presented here.

33  
34  
35  
36  
37  
38  
39  
40  
41  
42  
43  
44  
45  
46

**Table S2.** Statistics for the model performance of C<sub>3</sub>H<sub>8</sub> in comparison to measurements at remote stations.

|                | without REAS     |                  | with REAS        |                  |
|----------------|------------------|------------------|------------------|------------------|
|                | NH               | SH               | NH               | SH               |
| MB (ppt)       | $-1543 \pm 1672$ | $-289 \pm 432$   | $-1464 \pm 1676$ | $-263 \pm 407$   |
| NMB            | $-0.92 \pm 1.00$ | $-0.80 \pm 1.20$ | $-0.87 \pm 1.00$ | $-0.73 \pm 1.13$ |
| slope          | 0.03             | 0.14             | 0.05             | 0.25             |
| r <sup>2</sup> | 0.39             | 0.57             | 0.22             | 0.57             |

**Table S3.** Statistics for the model performance of NO<sub>2</sub> in comparison to measurements at urban stations.

|                | without REAS     |                  | with REAS        |                  |
|----------------|------------------|------------------|------------------|------------------|
|                | Asia             | outside Asia     | Asia             | outside Asia     |
| MB (ppb)       | $-10.0 \pm 7.1$  | $-5.9 \pm 4.7$   | $-10.3 \pm 7.0$  | $-5.9 \pm 4.7$   |
| NMB            | $-0.59 \pm 0.42$ | $-0.68 \pm 0.55$ | $-0.61 \pm 0.42$ | $-0.68 \pm 0.55$ |
| slope          | 0.33             | 0.19             | 0.34             | 0.19             |
| r <sup>2</sup> | 0.56             | 0.44             | 0.58             | 0.44             |

**Table S4.** Statistics for the model performance of O<sub>3</sub> in comparison to measurements at urban stations.

|                | without REAS    |                 | with REAS       |                 |
|----------------|-----------------|-----------------|-----------------|-----------------|
|                | Asia            | outside Asia    | Asia            | outside Asia    |
| MB (ppb)       | $15 \pm 12$     | $14 \pm 7$      | $17 \pm 12$     | $13 \pm 7$      |
| NMB            | $0.54 \pm 0.43$ | $0.50 \pm 0.27$ | $0.59 \pm 0.41$ | $0.48 \pm 0.27$ |
| slope          | 0.80            | 0.57            | 0.80            | 0.56            |
| r <sup>2</sup> | 0.60            | 0.62            | 0.61            | 0.61            |
