# Supplementary material for: Combining the Emission Preprocessor HERMES with the Chemical Transport Model TM5-MP
Source: MDPI journal article supplement (doi:10.3390/atmos15040469), 2024-04-10
Supplement: s1 [file s1]

Archive with 2 entries (2 files):
- EI_configuration_case_study.csv
- track_changes_supplementary.pdf
