# Supplementary material for: Combining the Emission Preprocessor HERMES with the Chemical Transport Model TM5-MP
Source: MDPI journal article supplement (doi:10.3390/atmos15040469), 2024-04-10
Supplement: s1 [file s1 › EI_configuration_case_study.csv]

ei;sector;ref_year;active;factor_mask;regrid_mask;pollutants;path;frequency;source_type;p_vertical;p_month;p_week;p_hour;p_speciation;p_day
##CMIP6_AGR
CMIP6;agriculture;current;1;;-	AFG	BGD	BRN	BTN	CHN	IDN	IND	JPN	KHM	KOR	LAO	LKA	MDV	MMR	MNG	MYS	NPL	PAK	PHL	SGP	THA	TWN	VNM;bc	bc_bf	ch4	co	nh3	nox_no2	oc	oc_bf	so2	voc01	voc02	voc03	voc04	voc05	voc06	voc07	voc08	voc09	voc12	voc13	voc15	voc16	voc17	voc18	voc19	voc20	voc21
REAS;MANURE_MANAGEMENT;current;1;;+	AFG	BGD	BRN	BTN	CHN	IDN	IND	JPN	KHM	KOR	LAO	LKA	MDV	MMR	MNG	MYS	NPL	PAK	PHL	SGP	THA	TWN	VNM;nh3;/mnt/beegfs/user/slmeyer/Promotion/HERMES/model/REAS_preproc/monthly_mean;monthly;area;;;;;E011a;
REAS;FERTILIZER;current;1;;+	AFG	BGD	BRN	BTN	CHN	IDN	IND	JPN	KHM	KOR	LAO	LKA	MDV	MMR	MNG	MYS	NPL	PAK	PHL	SGP	THA	TWN	VNM;nh3;/mnt/beegfs/user/slmeyer/Promotion/HERMES/model/REAS_preproc/monthly_mean;monthly;area;;;;;E011a;
CMIP6;agriculture;current;1;;+	AFG	BGD	BRN	BTN	CHN	IDN	IND	JPN	KHM	KOR	LAO	LKA	MDV	MMR	MNG	MYS	NPL	PAK	PHL	SGP	THA	TWN	VNM;bc	bc_bf	ch4	co	nox_no2	oc	oc_bf	so2;/mnt/beegfs/user/slmeyer/Promotion/HERMES/model/cmip6_preproc/monthly_mean;monthly;area;;;;;E021a;
REAS;TOTAL;current;1;;+	AFG	BGD	BRN	BTN	CHN	IDN	IND	JPN	KHM	KOR	LAO	LKA	MDV	MMR	MNG	MYS	NPL	PAK	PHL	SGP	THA	TWN	VNM;nmvoc;/mnt/beegfs/user/slmeyer/Promotion/HERMES/model/REAS_preproc/monthly_mean;monthly;area;;;;;E009h;
##CMIP6_ENE
CMIP6;energy;current;1;;;bc	bc_bf	ch4	co	nh3	nox_no2	oc	oc_bf	so2	voc01	voc02	voc03	voc04	voc05	voc06	voc07	voc08	voc09	voc12	voc13	voc15	voc16	voc17	voc18	voc19	voc20	voc21	voc22	voc23	voc24	voc25;/mnt/beegfs/user/slmeyer/Promotion/HERMES/model/cmip6_preproc/monthly_mean;monthly;area;;;;;E001;
##CMIP6_IND
CMIP6;industry;current;1;;-	AFG	BGD	BRN	BTN	CHN	IDN	IND	JPN	KHM	KOR	LAO	LKA	MDV	MMR	MNG	MYS	NPL	PAK	PHL	SGP	THA	TWN	VNM;bc	bc_bf	ch4	co	nh3	nox_no2	oc	oc_bf	so2	voc01	voc02	voc03	voc04	voc05	voc06	voc07	voc08	voc09	voc12	voc13	voc15	voc16	voc17	voc18	voc19	voc20	voc21
REAS;INDUSTRY;current;1;;+	AFG	BGD	BRN	BTN	CHN	IDN	IND	JPN	KHM	KOR	LAO	LKA	MDV	MMR	MNG	MYS	NPL	PAK	PHL	SGP	THA	TWN	VNM;nh3	so2	nox_no2	co	bc	oc;/mnt/beegfs/user/slmeyer/Promotion/HERMES/model/REAS_preproc/monthly_mean;monthly;area;;;;;E011b;
CMIP6;industry;current;1;;+	AFG	BGD	BRN	BTN	CHN	IDN	IND	JPN	KHM	KOR	LAO	LKA	MDV	MMR	MNG	MYS	NPL	PAK	PHL	SGP	THA	TWN	VNM;bc_bf	ch4	oc_bf;/mnt/beegfs/user/slmeyer/Promotion/HERMES/model/cmip6_preproc/monthly_mean;monthly;area;;;;;E021b;
REAS;TOTAL;current;1;;+	AFG	BGD	BRN	BTN	CHN	IDN	IND	JPN	KHM	KOR	LAO	LKA	MDV	MMR	MNG	MYS	NPL	PAK	PHL	SGP	THA	TWN	VNM;nmvoc;/mnt/beegfs/user/slmeyer/Promotion/HERMES/model/REAS_preproc/monthly_mean;monthly;area;;;;;E009b;
##CMIP6_RCO
CMIP6;residential;current;1;;-	AFG	BGD	BRN	BTN	CHN	IDN	IND	JPN	KHM	KOR	LAO	LKA	MDV	MMR	MNG	MYS	NPL	PAK	PHL	SGP	THA	TWN	VNM;bc	bc_bf	ch4	co	nh3	nox_no2	oc	oc_bf	so2	voc01	voc02	voc03	voc04	voc05	voc06	voc07	voc08	voc09	voc12	voc13	voc15	voc16	voc17	voc18	voc19	voc20	voc21
REAS;DOMESTIC;current;1;;+	AFG	BGD	BRN	BTN	CHN	IDN	IND	JPN	KHM	KOR	LAO	LKA	MDV	MMR	MNG	MYS	NPL	PAK	PHL	SGP	THA	TWN	VNM;so2	nox_no2	co	bc	oc;/mnt/beegfs/user/slmeyer/Promotion/HERMES/model/REAS_preproc/monthly_mean;monthly;area;;;;;E011c;
CMIP6;residential;current;1;;+	AFG	BGD	BRN	BTN	CHN	IDN	IND	JPN	KHM	KOR	LAO	LKA	MDV	MMR	MNG	MYS	NPL	PAK	PHL	SGP	THA	TWN	VNM;bc_bf	ch4	nh3	oc_bf;/mnt/beegfs/user/slmeyer/Promotion/HERMES/model/cmip6_preproc/monthly_mean;monthly;area;;;;;E021c;
REAS;TOTAL;current;1;;+	AFG	BGD	BRN	BTN	CHN	IDN	IND	JPN	KHM	KOR	LAO	LKA	MDV	MMR	MNG	MYS	NPL	PAK	PHL	SGP	THA	TWN	VNM;nmvoc;/mnt/beegfs/user/slmeyer/Promotion/HERMES/model/REAS_preproc/monthly_mean;monthly;area;;;;;E009f;
##CMIP6_SHP
CMIP6;ships;current;1;;;bc	bc_bf	ch4	co	nh3	nox_no2	oc	oc_bf	so2	voc01	voc02	voc03	voc04	voc05	voc06	voc07	voc08	voc09	voc12	voc13	voc15	voc16	voc17	voc18	voc19	voc20	voc21	voc22	voc23	voc24	voc25;/mnt/beegfs/user/slmeyer/Promotion/HERMES/model/cmip6_preproc/monthly_mean;monthly;area;;;;;E001;
##CMIP6_SLV
CMIP6;solvents;current;1;;;bc	bc_bf	ch4	co	nh3	nox_no2	oc	oc_bf	so2	voc01	voc02	voc03	voc04	voc05	voc06	voc07	voc08	voc09	voc12	voc13	voc15	voc16	voc17	voc18	voc19	voc20	voc21	voc22	voc23	voc24	voc25;/mnt/beegfs/user/slmeyer/Promotion/HERMES/model/cmip6_preproc/monthly_mean;monthly;area;;;;;E001;
##CMIP6_TRA
CMIP6;transport;current;1;;-	AFG	BGD	BRN	BTN	CHN	IDN	IND	JPN	KHM	KOR	LAO	LKA	MDV	MMR	MNG	MYS	NPL	PAK	PHL	SGP	THA	TWN	VNM;bc	bc_bf	ch4	co	nh3	nox_no2	oc	oc_bf	so2	voc01	voc02	voc03	voc04	voc05	voc06	voc07	voc08	voc09	voc12	voc13	voc15	voc16	voc17	voc18	voc19	voc20	voc21
REAS;ROAD_TRANSPORT;current;1;;+	AFG	BGD	BRN	BTN	CHN	IDN	IND	JPN	KHM	KOR	LAO	LKA	MDV	MMR	MNG	MYS	NPL	PAK	PHL	SGP	THA	TWN	VNM;so2	nox_no2	co	bc	oc	nh3;/mnt/beegfs/user/slmeyer/Promotion/HERMES/model/REAS_preproc/monthly_mean;monthly;area;;;;;E011b;
REAS;OTHER_TRANSPORT;current;1;;+	AFG	BGD	BRN	BTN	CHN	IDN	IND	JPN	KHM	KOR	LAO	LKA	MDV	MMR	MNG	MYS	NPL	PAK	PHL	SGP	THA	TWN	VNM;so2	nox_no2	co	bc	oc	nh3;/mnt/beegfs/user/slmeyer/Promotion/HERMES/model/REAS_preproc/monthly_mean;monthly;area;;;;;E011b;
CMIP6;transport;current;1;;+	AFG	BGD	BRN	BTN	CHN	IDN	IND	JPN	KHM	KOR	LAO	LKA	MDV	MMR	MNG	MYS	NPL	PAK	PHL	SGP	THA	TWN	VNM;bc_bf	ch4	oc_bf;/mnt/beegfs/user/slmeyer/Promotion/HERMES/model/cmip6_preproc/monthly_mean;monthly;area;;;;;E021b;
REAS;TOTAL;current;1;;+	AFG	BGD	BRN	BTN	CHN	IDN	IND	JPN	KHM	KOR	LAO	LKA	MDV	MMR	MNG	MYS	NPL	PAK	PHL	SGP	THA	TWN	VNM;nmvoc;/mnt/beegfs/user/slmeyer/Promotion/HERMES/model/REAS_preproc/monthly_mean;monthly;area;;;;;E009d;
##CMIP6_WST
CMIPt
;waste;current;1;;;bc	bc_bf	ch4	co	nh3	nox_no2	oc	oc_bf	so2	voc01	voc02	voc03	voc04	voc05	voc06	voc07	voc08	voc09	voc12	voc13	voc15	voc16	voc17	voc18	voc19	voc20	voc21	voc22	voc23	voc24	voc25;/mnt/beegfs/user/slmeyer/Promotion/HERMES/model/cmip6_preproc/monthly_mean;monthly;area;;;;;E001;
##CMIP6_AIR
CMIP6;air_crs_3d;current;1;;;bc	ch4	co	nh3	nox_no2	oc	so2	nmvoc;/mnt/beegfs/user/slmeyer/Promotion/HERMES/model/cmip6_preproc/monthly_mean;monthly;area;;;;;E002;
CMIP6;air_tl_3d;current;1;;;bc	ch4	co	nh3	nox_no2	oc	so2	nmvoc;/mnt/beegfs/user/slmeyer/Promotion/HERMES/model/cmip6_preproc/monthly_mean;monthly;area;;;;;E003;
[truncated: 4 more columns]
